## Correction

# Correction: Age-Dependent Enterocyte Invasion and Microcolony Formation by *Salmonella*

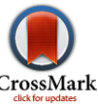

## The *PLOS Pathogens* Staff

The fourth author's name is spelled incorrectly. The correct name is: Frederik Gohde. The citation remains the same.

## Reference

1. Zhang K, Dupont A, Torow N, Gohde F, Leschner S, et al. (2014) Age-Dependent Enterocyte Invasion and Microcolony Formation by *Salmonella*. *PLoS Pathog* 10(9): e1004385. doi:10.1371/journal.ppat.1004385

---

**Citation:** The *PLOS Pathogens* Staff (2014) Correction: Age-Dependent Enterocyte Invasion and Microcolony Formation by *Salmonella*. *PLoS Pathog* 10(9): e1004476. doi:10.1371/journal.ppat.1004476

**Published** September 25, 2014

**Copyright:** © 2014 The *PLOS Pathogens* Staff. This is an open-access article distributed under the terms of the Creative Commons Attribution License, which permits unrestricted use, distribution, and reproduction in any medium, provided the original author and source are credited.
